# Supplementary material for: Transversal immission patterns and leachability of heavy metals in road side soils
Source: Royal Society of Chemistry journal article supplement (doi:10.1039/b804634d), 2008-01-01
Supplement: b804634d.pdf [file b804634d.pdf]

Supporting information for

1 **Transversal immission patterns and leachability**  
2 **of heavy metals in road side soils**  
3

*David S. T. Hjortenkrans<sup>\*</sup>, Bo G. Bergbäck and Agneta V. Höggerud*

School of Pure and Applied Natural Sciences, University of Kalmar, Sweden

\*Corresponding author, telephone: +46-480-446220; fax: +46-480-447305; e-mail:

david.hjortenkrans@hik.se

Contents:

Number of Pages: 3

Number of Tables: 2

Number of Figures: 0

4 **Table S1.** Loss of ignition (LOI), pH and metal concentrations (Cd, Cr, Cu, Ni, Pb, Sb and Zn) in  
 5 road side soils at different depth and distance from road. The site is located outside Kalmar at E22  
 6 in south east of Sweden.

| Distance from road | Depth     | LOI (%) | pH  | Cd (mg/kg) | Cr (mg/kg) | Cu (mg/kg) | Ni (mg/kg) | Pb (mg/kg) | Sb (mg/kg) | Zn (mg/kg) |
|--------------------|-----------|---------|-----|------------|------------|------------|------------|------------|------------|------------|
| 0.4                | 0-1.5     | 6.1     | 6.0 | 0.22       | 53         | 63         | 10         | 29         | 8.2        | 260        |
|                    | 1.5-4.5   | 5.7     | 6.1 | 0.21       | 26         | 65         | 8.6        | 31         | 3.9        | 180        |
|                    | 4.5-7.5   | 3.3     | 6.1 | 0.23       | 20         | 56         | 7.8        | 140        | 1.8        | 160        |
|                    | 7.5-12.5  | 2.6     | 6.1 | 0.20       | 50         | 59         | 11         | 220        | 4.2        | 170        |
| 1.4                | 0-1.5     | 7.2     | 6.1 | 0.23       | 27         | 68         | 12         | 46         | 5.5        | 190        |
|                    | 1.5-4.5   | 5.1     | 6.1 | 0.28       | 31         | 55         | 8.3        | 110        | 2.3        | 170        |
|                    | 4.5-7.5   | 2.3     | 6.0 | 0.12       | 16         | 16         | 7.7        | 110        | 0.58       | 79         |
|                    | 7.5-12.5  | 0.83    | 6.0 | 0.078      | 12         | 12         | 3.9        | 20         | 0.40       | 52         |
|                    | 12.5-17.5 | 0.63    | 5.9 | 0.059      | 7.7        | 8.4        | 3.3        | 15         | 0.40       | 34         |
|                    | 17.5-25   | 0.59    | 5.7 | 0.048      | 8.7        | 6.2        | 3.6        | 11         | 0.45       | 33         |
| 2.5                | 0-1.5     | 5.8     | 5.7 | 0.17       | 38         | 46         | 9.0        | 96         | 2.1        | 180        |
|                    | 1.5-4.5   | 2.2     | 5.6 | 0.094      | 12         | 21         | 6.7        | 70         | 0.68       | 120        |
|                    | 4.5-7.5   | 0.78    | 5.5 | 0.14       | 8.9        | 11         | 4.2        | 21         | 0.82       | 100        |
|                    | 7.5-12.5  | 0.59    | 5.5 | 0.058      | 7.0        | 9.3        | 3.6        | 14         | 0.26       | 78         |
|                    | 12.5-17.5 | 0.51    | 5.4 | 0.045      | 10         | 9.0        | 4.3        | 13         | 0.31       | 74         |
|                    | 17.5-25   | 0.38    | 5.3 | 0.047      | 8.0        | 9.9        | 4.0        | 11         | 0.36       | 72         |
| 5.0                | 0-1.5     | 5.9     | 5.6 | 0.11       | 17         | 25         | 5.5        | 65         | 1.3        | 110        |
|                    | 1.5-4.5   | 2.9     | 5.0 | 0.095      | 12         | 15         | 5.6        | 53         | 0.92       | 89         |
|                    | 4.5-7.5   | 1.0     | 4.6 | 0.051      | 9.5        | 8.9        | 4.6        | 20         | 0.47       | 70         |
|                    | 7.5-12.5  | 0.75    | 4.5 | 0.056      | 10         | 8.9        | 4.9        | 12         | 0.82       | 67         |
|                    | 12.5-17.5 | 0.61    | 4.5 | 0.038      | 11         | 6.9        | 4.3        | 11         | 0.37       | 66         |
|                    | 17.5-25   | 0.57    | 4.5 | 0.051      | 8.5        | 6.8        | 4.3        | 9.8        | 0.21       | 67         |
| 7.0                | 0-1.5     | 41      | 4.7 | 0.64       | 31         | 66         | 20         | 60         | 4.6        | 370        |
|                    | 1.5-4.5   | 18      | 4.7 | 0.13       | 20         | 22         | 7.7        | 38         | 1.2        | 110        |
|                    | 4.5-7.5   | 3.5     | 4.8 | 0.063      | 20         | 14         | 6.1        | 20         | 0.82       | 50         |
|                    | 7.5-12.5  | 1.8     | 4.5 | 0.040      | 20         | 7.7        | 4.7        | 8.1        | 1.1        | 22         |
|                    | 12.5-17.5 | 2.8     | 4.5 | 0.020      | 23         | 8.8        | 4.6        | 7.3        | 0.65       | 19         |
|                    | 17.5-25   | 3.3     | 4.2 | 0.044      | 26         | 11         | 5.7        | 7.1        | 0.44       | 23         |
| 10.0               | 0-1.5     | 8.0     | 5.0 | 0.13       | 17         | 13         | 6.1        | 20         | 0.91       | 66         |
|                    | 1.5-4.5   | 6.4     | 5.0 | 0.14       | 19         | 11         | 6.2        | 19         | 0.67       | 38         |
|                    | 4.5-7.5   | 5.4     | 5.0 | 0.15       | 17         | 12         | 5.6        | 19         | 0.47       | 36         |
|                    | 7.5-12.5  | 4.6     | 5.1 | 0.14       | 17         | 12         | 5.5        | 17         | 0.96       | 32         |
|                    | 12.5-17.5 | 6.5     | 5.1 | 0.17       | 17         | 11         | 5.5        | 16         | 0.25       | 30         |
| 20.0               | 0-1.5     | 8.4     | 5.1 | 0.17       | 20         | 13         | 5.7        | 18         | 1.0        | 37         |
|                    | 1.5-4.5   | 7.4     | 4.9 | 0.17       | 19         | 12         | 5.7        | 17         | 0.47       | 34         |
|                    | 4.5-7.5   | 6.6     | 4.9 | 0.18       | 18         | 13         | 6.0        | 17         | 0.48       | 32         |
| 35.0               | 0-1.5     | 8.6     | 5.2 | 0.15       | 17         | 11         | 5.1        | 18         | 0.61       | 36         |
|                    | 1.5-4.5   | 6.8     | 5.2 | 0.15       | 18         | 11         | 5.2        | 19         | 1.0        | 33         |
|                    | 4.5-7.5   | 6.0     | 5.0 | 0.16       | 17         | 11         | 5.3        | 19         | 0.75       | 32         |
| 45.0               | 0-1.5     | 11      | 5.2 | 0.21       | 18         | 13         | 5.8        | 23         | 0.75       | 56         |
|                    | 1.5-4.5   | 7.8     | 5.1 | 0.17       | 22         | 12         | 5.2        | 24         | 1.0        | 38         |
|                    | 4.5-7.5   | 7.0     | 5.0 | 0.15       | 18         | 13         | 5.7        | 24         | 0.84       | 35         |
|                    | 7.5-12.5  | 6.0     | 4.8 | 0.15       | 17         | 12         | 5.7        | 24         | 0.26       | 32         |

7

8 **Table S2.** Loss of ignition (LOI), pH and metal concentrations (Cd, Cr, Cu, Ni, Pb, Sb and Zn) in road  
9 side soils at different depth and distance from road. The site is located outside Varberg at E6 in south  
10 west of Sweden.

| Distance<br>(m) | Depth<br>(cm) | LOI<br>(%) | pH  | Cd<br>(mg/kg) | Cr<br>(mg/kg) | Cu<br>(mg/kg) | Ni<br>(mg/kg) | Pb<br>(mg/kg) | Sb<br>(mg/kg) | Zn<br>(mg/kg) |
|-----------------|---------------|------------|-----|---------------|---------------|---------------|---------------|---------------|---------------|---------------|
| 0.4             | 0-1.5         | 8.3        | 5.2 | 0.22          | 24            | 110           | 123           | 15            | 4.5           | 310           |
|                 | 1.5-4.5       | 7.6        | 4.7 | 0.13          | 32            | 120           | 15            | 48            | 2.8           | 270           |
|                 | 4.5-7.5       | 5.5        | 4.7 | 0.056         | 19            | 50            | 14            | 16            | 1.1           | 110           |
|                 | 7.5-12.5      | 3.7        | 4.7 | 0.054         | 12            | 49            | 14            | 11            | 1.0           | 110           |
| 1.4             | 0-1.5         | 10         | 5.1 | 0.065         | 11            | 23            | 14            | 12            | 0.78          | 66            |
|                 | 1.5-4.5       | 8.3        | 4.7 | 0.72          | 6.7           | 19            | 2.7           | 12            | 0.61          | 45            |
|                 | 4.5-7.5       | 7.4        | 4.5 | 0.082         | 5.7           | 6.9           | 1.7           | 10            | 0.42          | 25            |
|                 | 7.5-12.5      | 7.4        | 4.4 | 0.076         | 4.0           | 4.9           | 1.0           | 6.0           | 0.32          | 19            |
|                 | 12.5-17.5     | 5.7        | 4.2 | 0.058         | 12            | 6.6           | 3.7           | 4.2           | 0.80          | 28            |
|                 | 17.5-25       | 4.7        | 3.7 | 0.019         | 17            | 7.3           | 4.5           | 3.0           | 1.2           | 35            |
| 2.5             | 0-1.5         | 5.7        | 5.7 | 0.075         | 11            | 10            | 4.2           | 3.7           | 0.71          | 39            |
|                 | 1.5-4.5       | 5.0        | 5.8 | 0.077         | 11            | 8.3           | 4.1           | 3.4           | 0.61          | 33            |
|                 | 4.5-7.5       | 4.9        | 5.8 | 0.077         | 10            | 9.0           | 5.6           | 3.5           | 0.45          | 32            |
|                 | 7.5-12.5      | 5.6        | 5.7 | 0.093         | 9.4           | 8.7           | 5.7           | 4.5           | 0.55          | 30            |
|                 | 12.5-17.5     | 7.0        | 5.8 | 0.092         | 5.7           | 5.9           | 3.3           | 4.9           | 0.47          | 23            |
|                 | 17.5-25       | 7.1        | 6.2 | 0.079         | 7.4           | 6.2           | 3.3           | 5.0           | 0.60          | 22            |
| 5.0             | 0-1.5         | 6.2        | 5.7 | 0.070         | 17            | 9.6           | 7.3           | 2.7           | 1.0           | 36            |
|                 | 1.5-4.5       | 5.1        | 5.7 | 0.062         | 14            | 8.2           | 6.6           | 2.8           | 0.71          | 27            |
|                 | 4.5-7.5       | 5.3        | 5.8 | 0.061         | 17            | 9.6           | 7.4           | 4.6           | 0.72          | 32            |
|                 | 7.5-12.5      | 5.5        | 5.8 | 0.037         | 22            | 11            | 9.0           | 2.5           | 1.0           | 36            |
|                 | 12.5-17.5     | 5.9        | 4.5 | 0.019         | 22            | 10            | 7.4           | 2.3           | 1.1           | 32            |
|                 | 17.5-25       | 11         | 3.8 | 0.032         | 48            | 22            | 14            | 3.1           | 1.6           | 64            |
| 10              | 0-1.5         | 8.0        | 5.7 | 0.046         | 15            | 9.1           | 6.4           | 2.5           | 0.72          | 31            |
|                 | 1.5-4.5       | 7.0        | 5.8 | 0.045         | 15            | 8.7           | 6.4           | 2.3           | 0.70          | 31            |
|                 | 4.5-7.5       | 5.5        | 6.4 | 0.044         | 15            | 9.0           | 7.1           | 1.9           | 0.61          | 31            |
|                 | 7.5-12.5      | 5.6        | 6.2 | 0.036         | 17            | 9.5           | 7.1           | 2.2           | 0.75          | 30            |
|                 | 12.5-17.5     | 8.6        | 4.1 | 0.017         | 29            | 16            | 10            | 1.5           | 1.6           | 41            |
|                 | 17.5-25       | 6.4        | 3.6 | 0.020         | 21            | 13            | 7.3           | 2.2           | 1.2           | 30            |
| 25              | 0-1.5         | 7.1        | 6.3 | 0.075         | 15            | 7.6           | 7.1           | 1.2           | 0.56          | 32            |
|                 | 1.5-4.5       | 6.2        | 6.4 | 0.098         | 18            | 8.5           | 8.9           | 2.1           | 0.63          | 38            |
|                 | 4.5-7.5       | 4.6        | 6.5 | 0.086         | 15            | 8.2           | 7.6           | 1.4           | 0.54          | 32            |
|                 | 7.5-12.5      | 2.0        | 6.5 | 0.032         | 9.4           | 3.7           | 3.5           | 1.4           | 0.20          | 13            |
|                 | 12.5-17.5     | 2.0        | 6.3 | 0.010         | 4.1           | 1.6           | 1.3           | 0.93          | 0.038         | 6.0           |
|                 | 17.5-25       | 3.0        | 5.0 | 0.008         | 5.9           | 3.1           | 1.8           | 1.1           | 0.075         | 8.3           |

11
